# Supplementary material
Source: MDPI journal article supplement (https://www.mdpi.com/2073-4344/11/6/692)
Supplement: s1 [file s1]

## Supporting Information

### Effect of different catalyst supports on the quality, yield and morphology of carbon nanotubes produced from waste polypropylene plastics

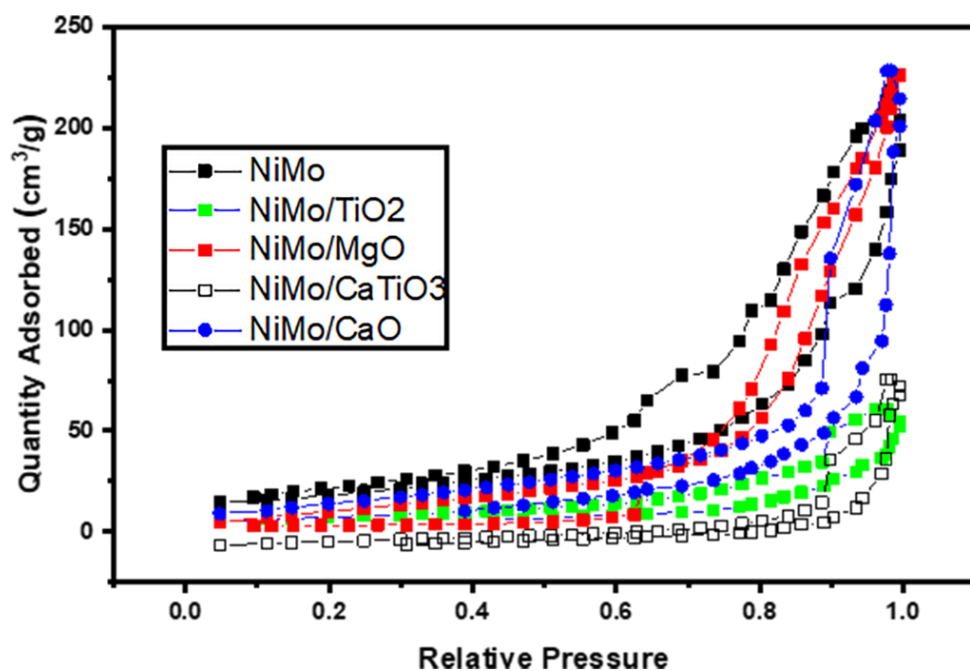

**Figure S1:** Nitrogen adsorption/desorption isotherms of all prepared NiMo supported and unsupported catalysts.

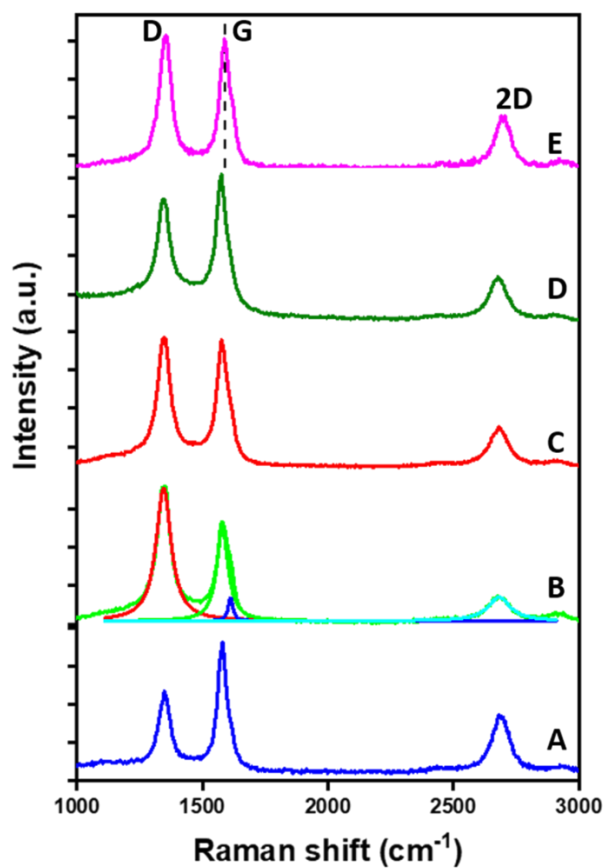

**Figure S2:** Raman spectra of as-synthesized CNTs with deconvoluted spectra: (A) CNT<sub>NiMo/CaTiO<sub>3</sub></sub>, (B) CNT<sub>NiMo</sub>, (C) CNT<sub>NiMo/CaO</sub>, (D) CNT<sub>NiMo/TiO<sub>2</sub></sub> and (E) CNT<sub>NiMo/MgO</sub>.
